# Supplementary material for: Palladium-catalysed direct polyheteroarylation of di- or tribromobenzene derivatives: a one step synthesis of conjugated poly(hetero)aromatics
Source: Royal Society of Chemistry journal article supplement (doi:10.1039/c1ra00370d), 2011-01-01

## Supplementary information

### Palladium-Catalysed Direct Polyheteroarylation of Di- or Tribromobenzene derivatives: A One Step Synthesis of Conjugated Poly(hetero)aromatics

Marya Baloch,<sup>a</sup> Reny Jacob Roy,<sup>a</sup> David Roy,<sup>a</sup> Kassem Beydoun,<sup>a</sup> Henri Doucet<sup>\*a</sup>

#### UV-Visible absorption and photoluminescent spectra of products 7, 15, 16, 23, 36

##### Product 7

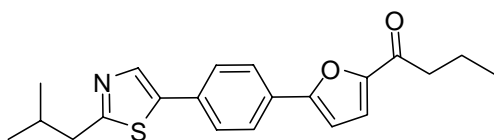

$$\epsilon = a/bc = 0.72 / 1 \cdot 10^{-5} = 72.000$$

Solvent : dichloromethane  
a = maximum absorbance  
b = path length of cuvette = 1cm  
c = concentration of solution  
 $\epsilon$  = molar absorptivity

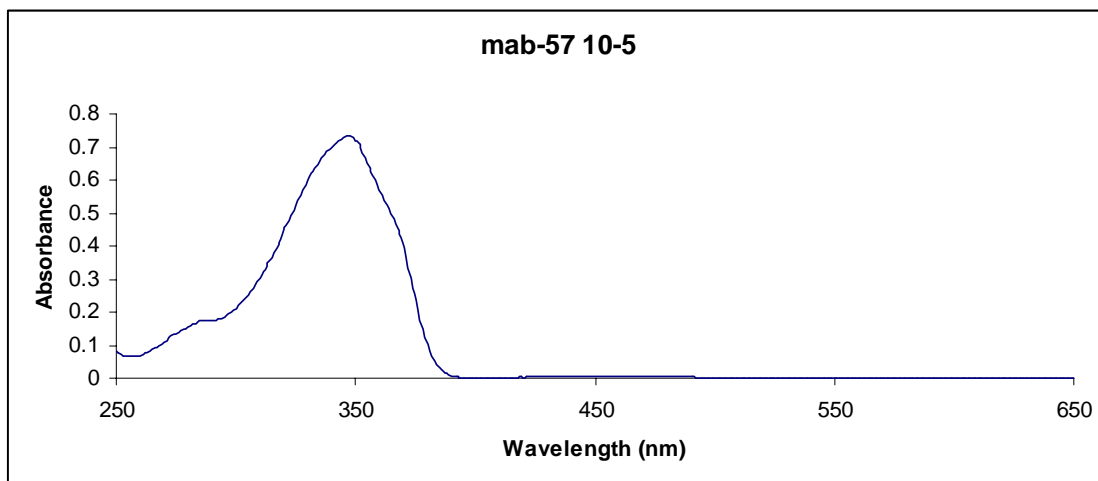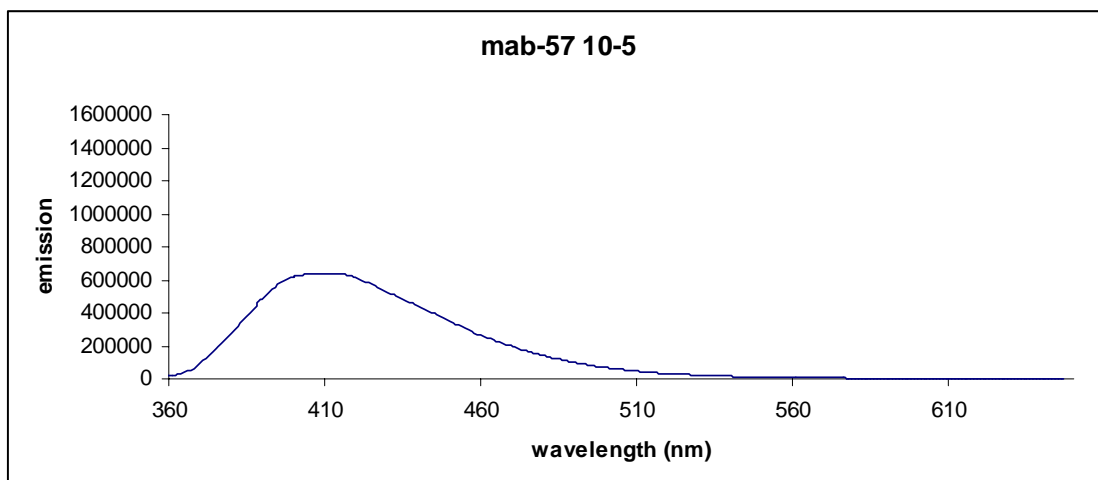

## Product 15

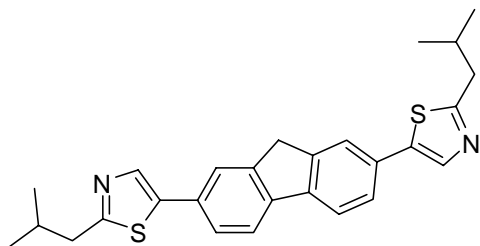

$$\epsilon = a/bc = 0.32 / 5 \times 10^{-6} = 64.000$$

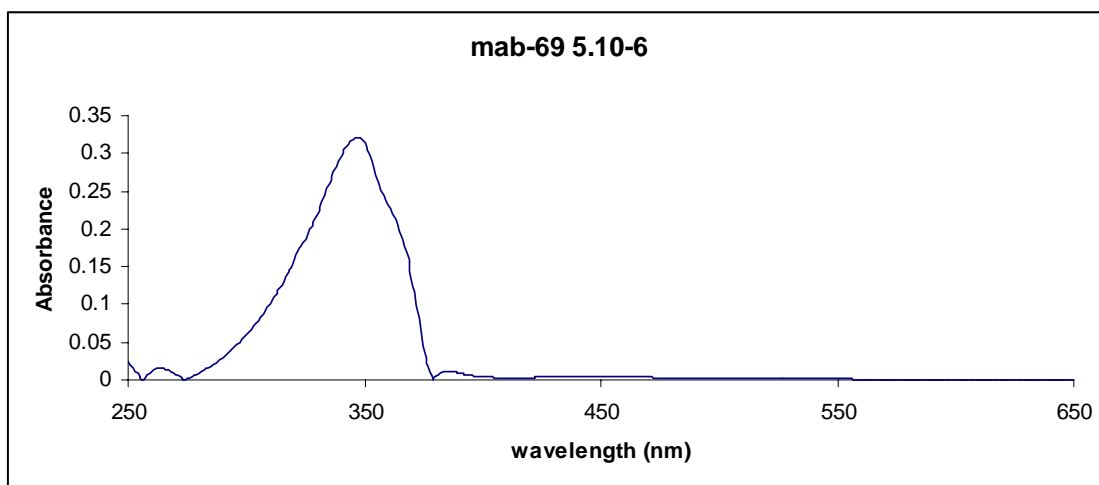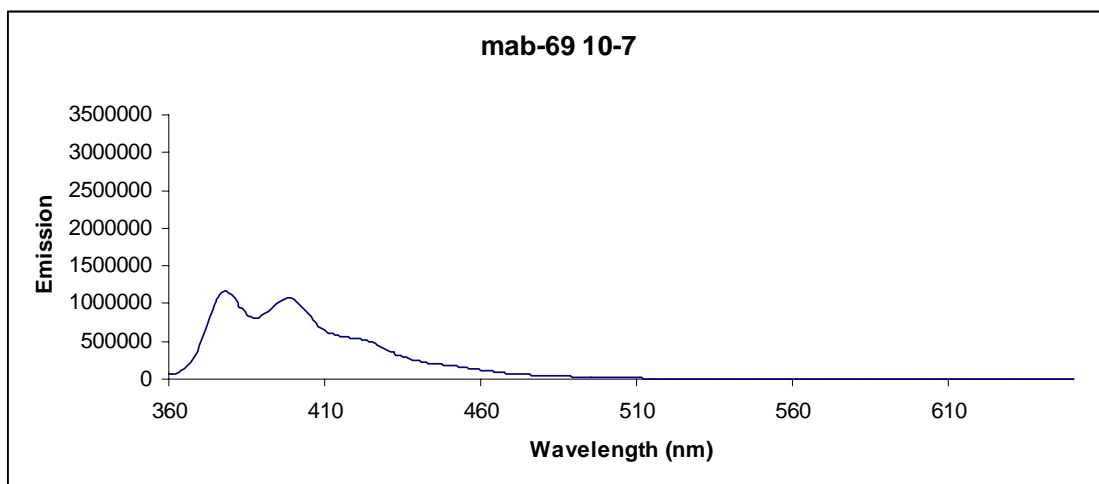

### Product 16

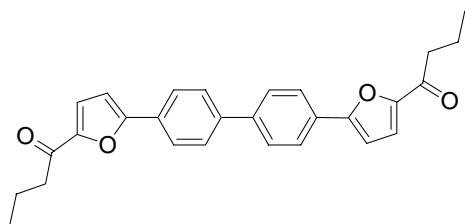

$$\epsilon = a/bc = 0.6 / 1 \times 10^{-5} = 60.000$$

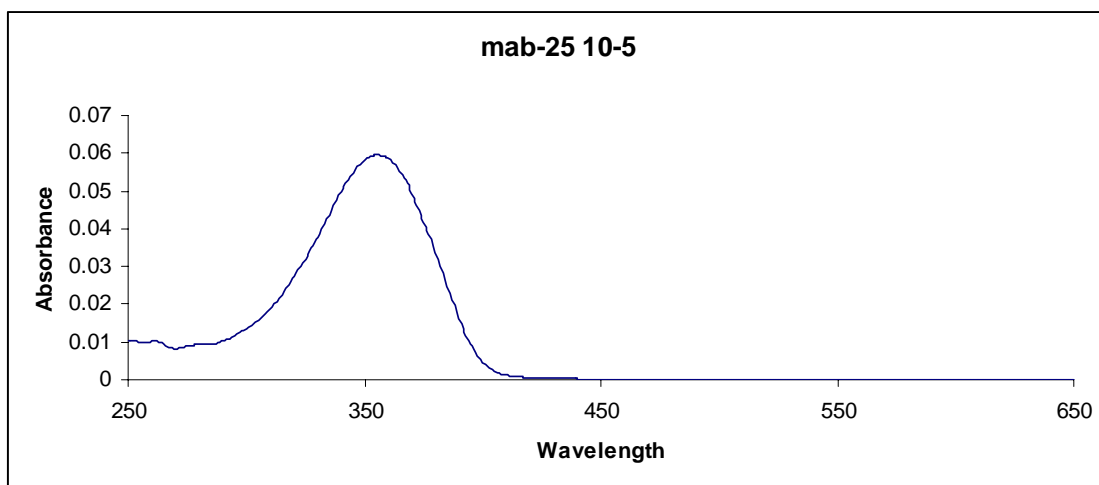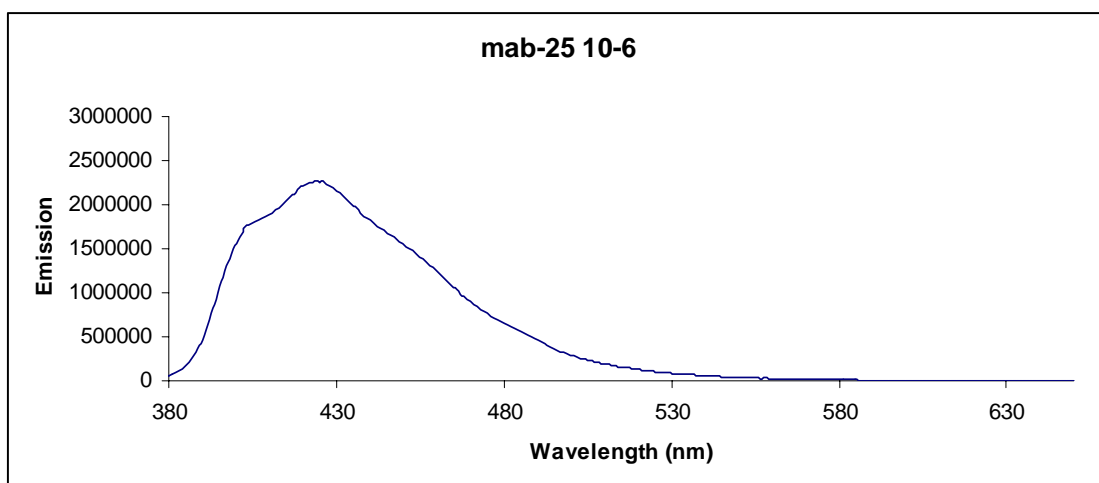

**Product 23**

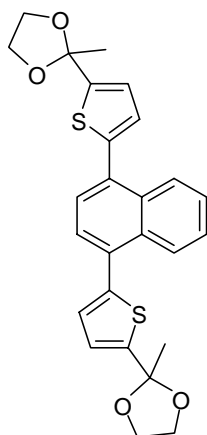

$$\epsilon = a/bc = 0.32 / 1 \times 10^{-5} = 32.000$$

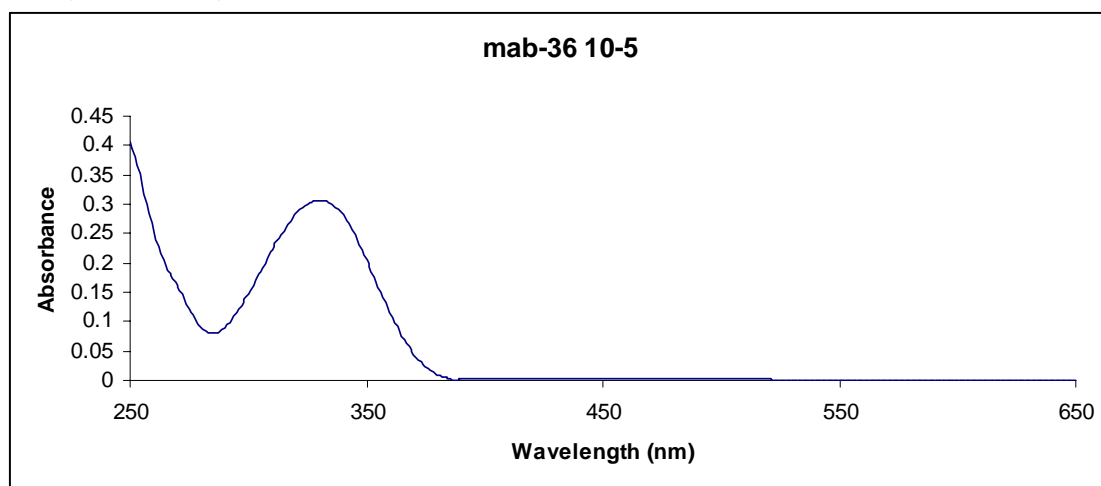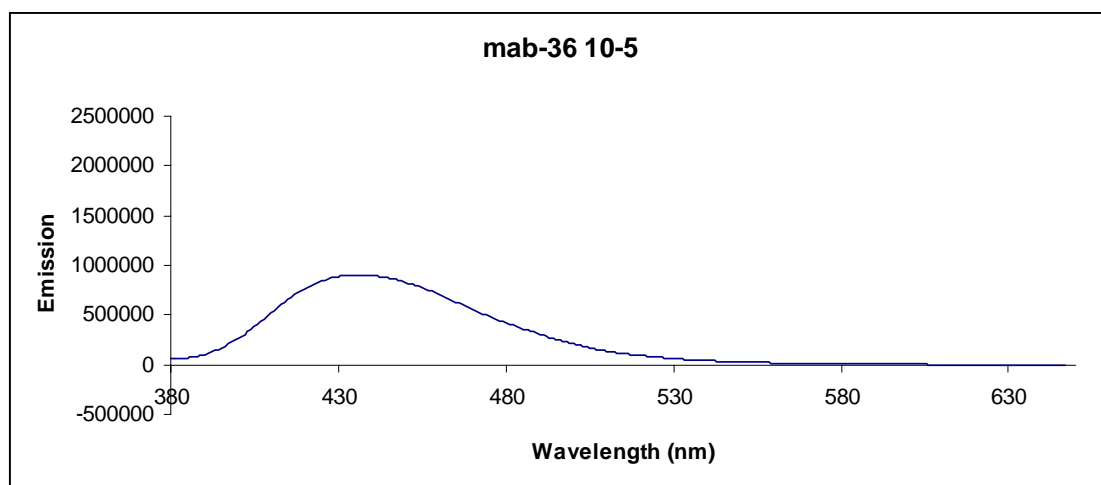

**Product 36**

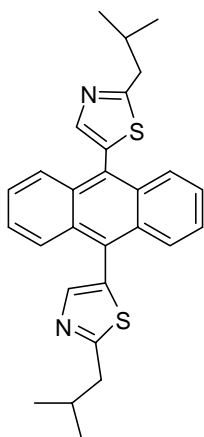

$$\epsilon = a/bc = 0.4 / 1 \times 10^{-5} = 40.000$$

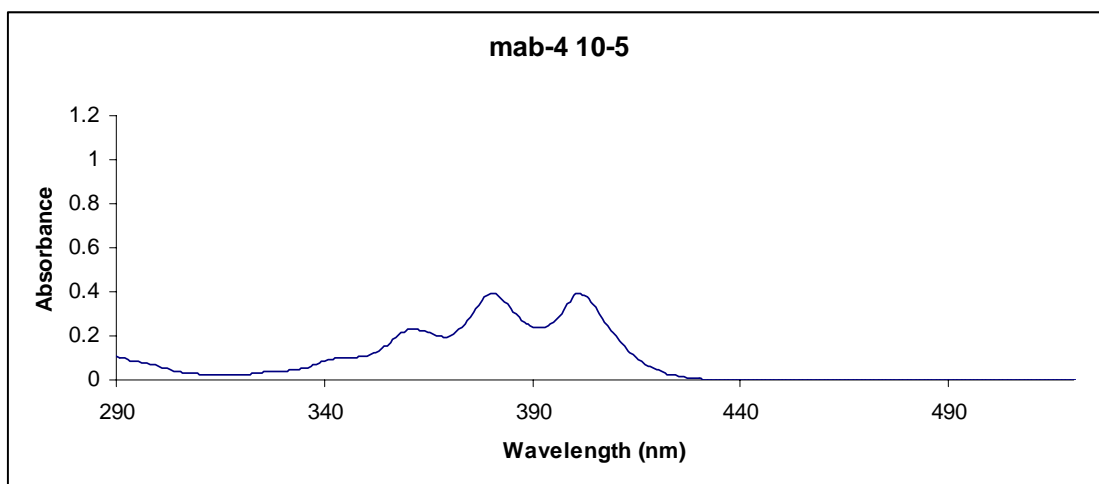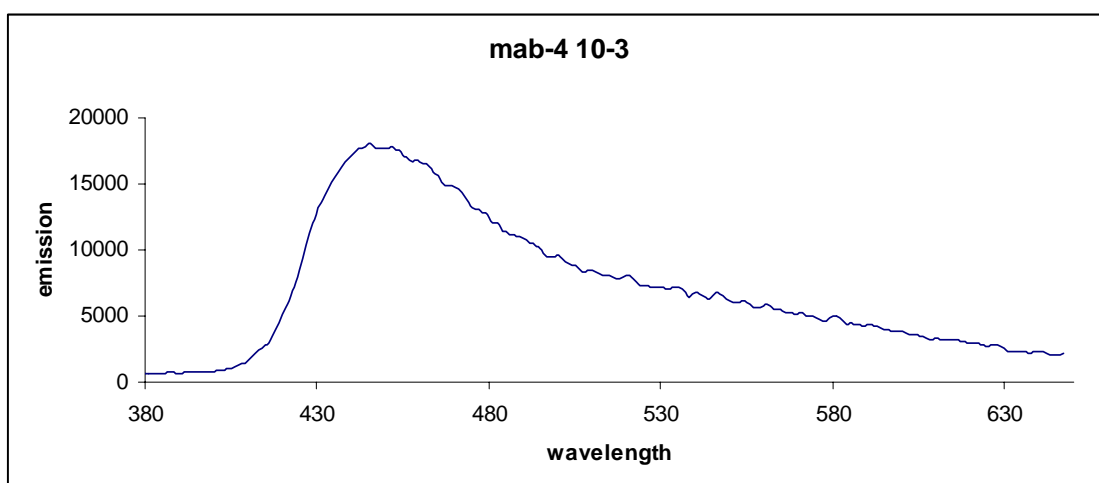

Supplement: c1ra00370d.pdf [file c1ra00370d.pdf]
